# Supplementary material for: Cd-Doped FeSe nanoparticles embedded in N-doped carbon: a potential anode material for lithium storage
Source: Royal Society of Chemistry journal article supplement (doi:10.1039/d1nj04642j), 2021-01-01
Supplement: d1nj04642j1.pdf [file d1nj04642j1.pdf]

## Supporting Information for

# **Cd doped FeSe Nanoparticles Embedded in N-doped Carbon: A Potential Anode Material for Lithium Storage**

Xiuyan Meng<sup>#</sup>, Shuolei Deng<sup>#</sup>, Liang Feng, Yang Jiang\*, Rongna Chen, Huiyang  
Gou and Li Hou\*

Hebei Key Laboratory of Applied Chemistry, School of Environmental and Chemical  
Engineering, 438 West Hebei Street, Yanshan University, Qinhuangdao 066004, China

\*Corresponding authors.

*E-mail address:* jiangyang@ysu.edu.cn (Y. Jiang); holy@ysu.edu.cn (L. Hou)

<sup>#</sup>These authors contributed equally to this work.

## Supplementary Figures

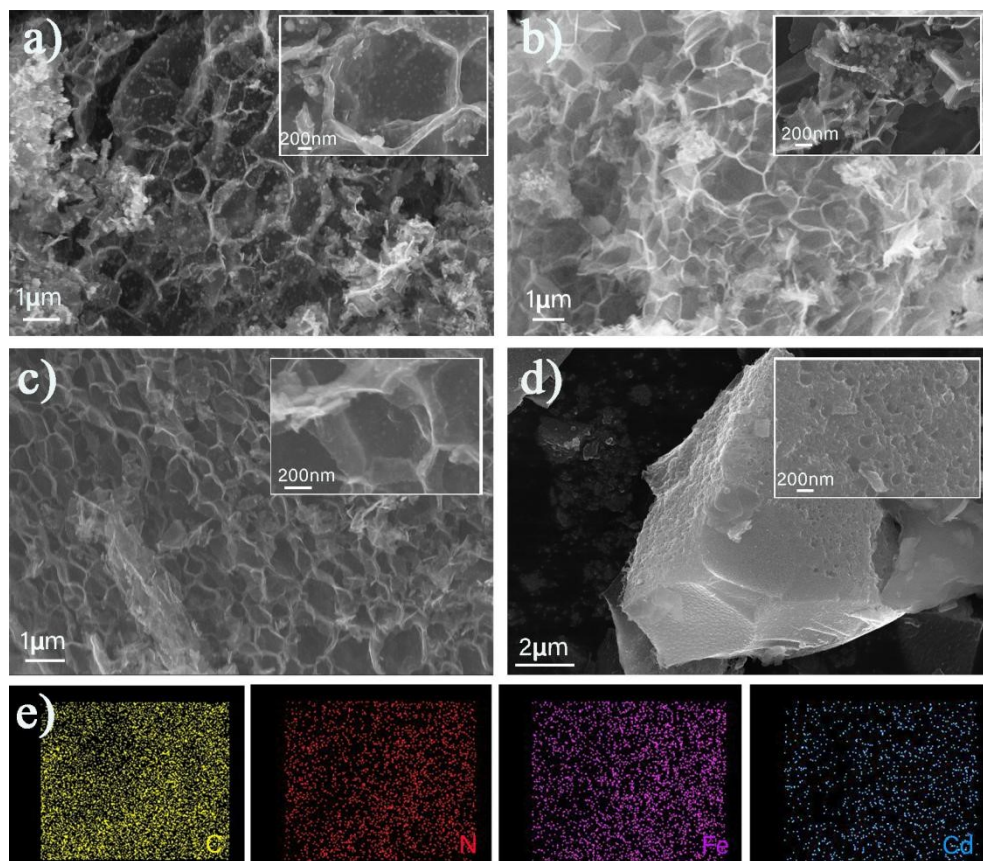

Fig. S1 SEM images of a) Fe<sub>3</sub>C/C-N; b) Fe<sub>3</sub>C-Cd<sub>0.2</sub>/C-N; c) Fe<sub>3</sub>C-Cd<sub>0.4</sub>/C-N; d) Fe<sub>3</sub>C-Cd<sub>0.6</sub>/C-N; e) Element mapping of Fe<sub>3</sub>C-Cd<sub>0.4</sub>/C-N composite sample under scanning

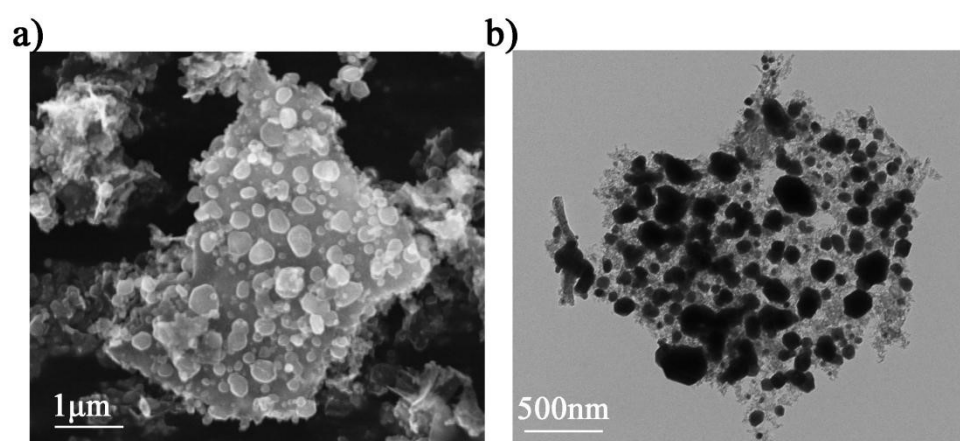

Fig. S2 (a) SEM image and (b) TEM image of non-Cd doped FeSe/ C-N

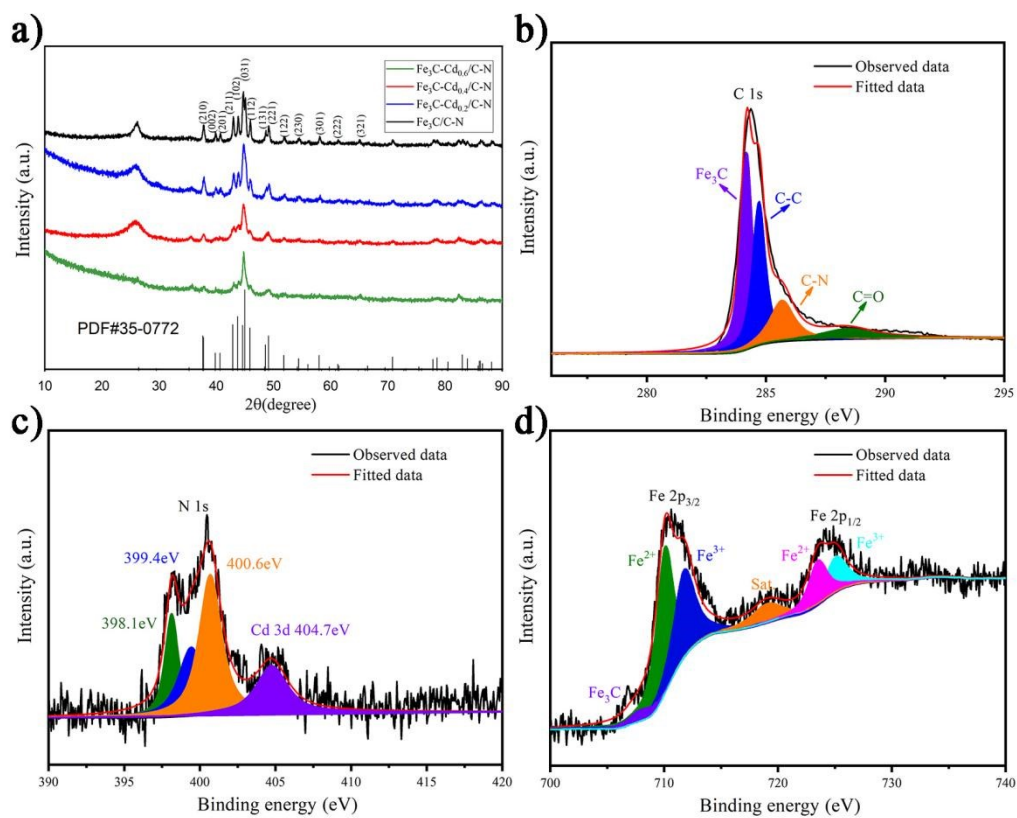

Fig. S3 a) XRD patterns of Fe<sub>3</sub>C/C-N, Fe<sub>3</sub>C-Cd<sub>0.2</sub>/C-N, Fe<sub>3</sub>C-Cd<sub>0.4</sub>/C-N and Fe<sub>3</sub>C-Cd<sub>0.6</sub>/C-N samples; b) C 1s spectrum; c) N 1s and Cd 3d spectrum; d) Fe 2p spectrum of Fe<sub>3</sub>C-Cd<sub>0.4</sub>/C-N.

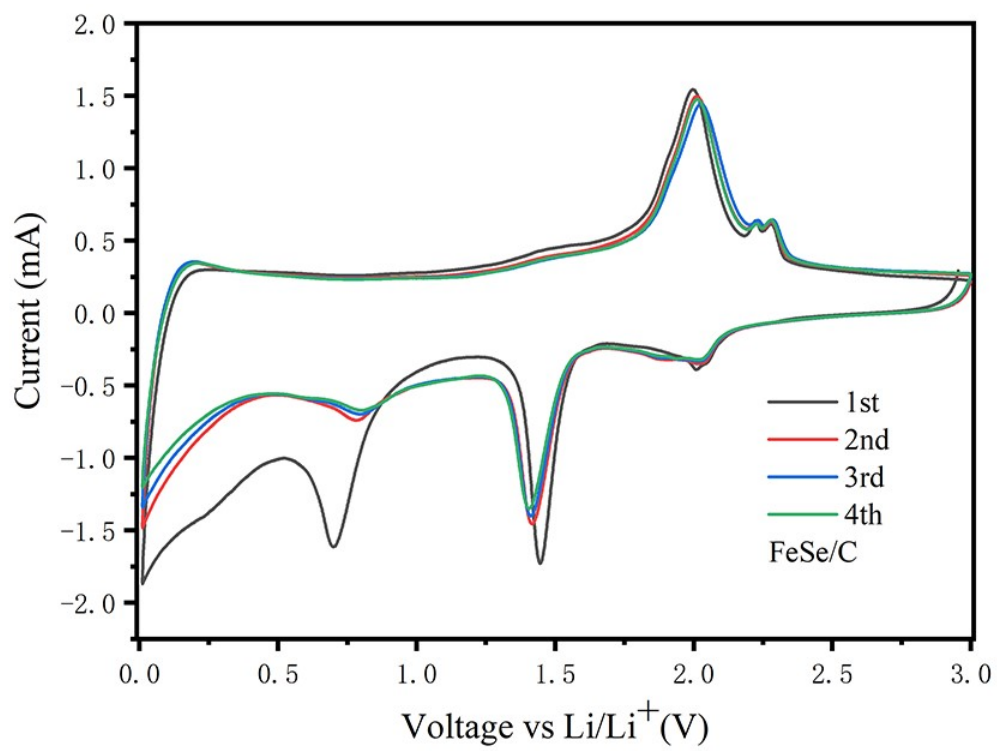

Fig. S4 CV curves of non-Cd doped FeSe/C-N.

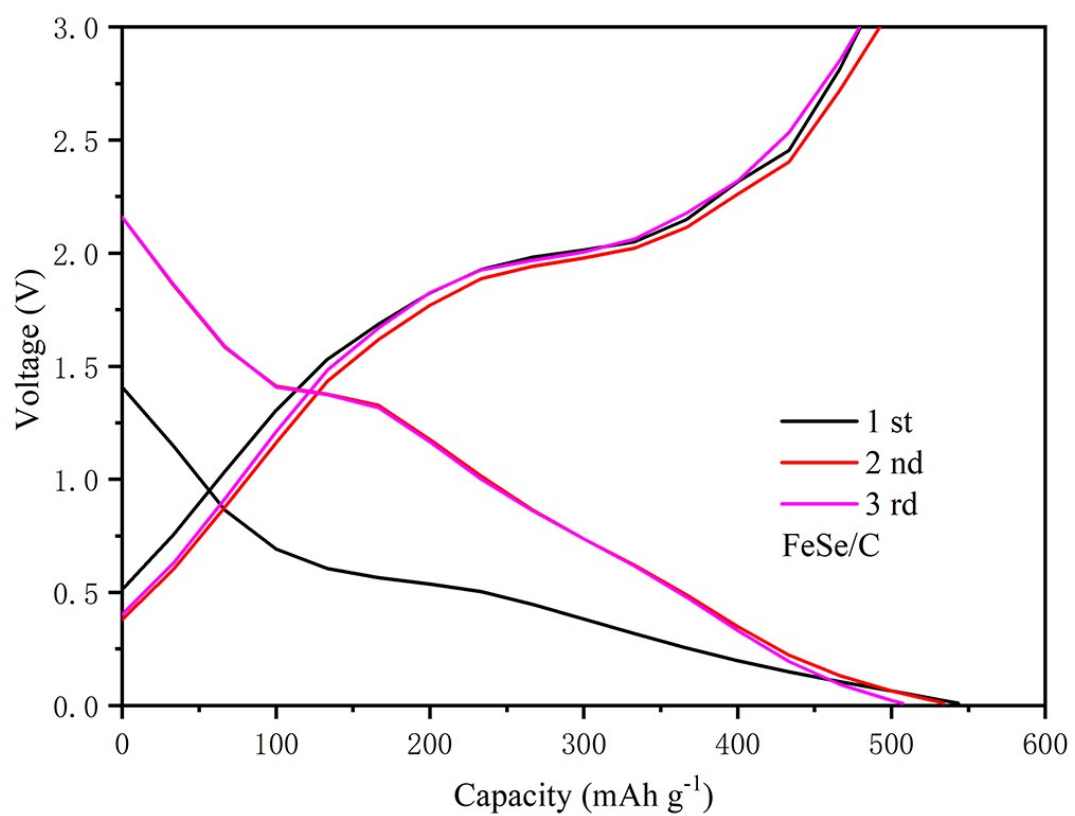

Fig. S5 Charge-discharge curves of non-Cd doped FeSe /C-N.

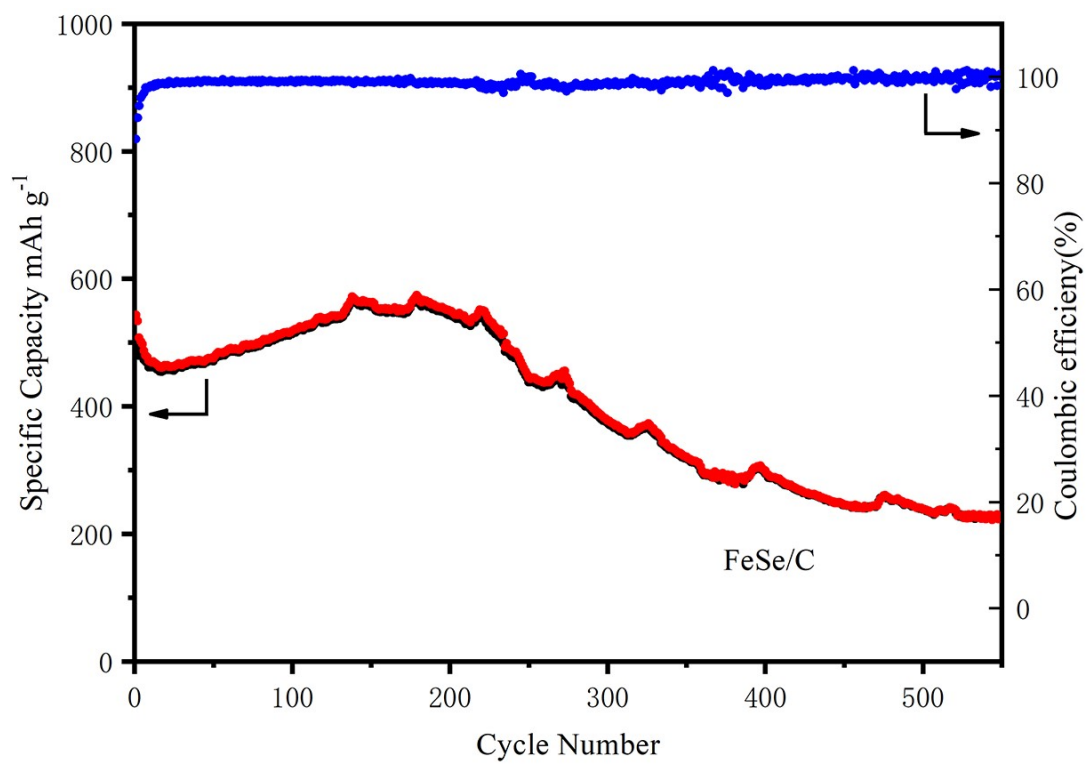

Fig. S6 Cycling performance of non-Cd doped FeSe/C-N
